# Supplementary material
Source: publisher site journal article supplement (http://www.kjim.org/upload/media/kjim-2021-403-suppl.pdf)
Supplement: Supplementary file 1 [file kjim-2021-403-suppl.pdf]

**Supplementary Table 1. Korean Severe Asthma Registry (KoSAR) participating institutions and investigators**

| Locations<br>(no. of institutions) | Institutions                               | Investigators                                                                                 |
|------------------------------------|--------------------------------------------|-----------------------------------------------------------------------------------------------|
| Seoul (14)                         | Asan Medical Center                        | You Sook Cho<br>Yeon-Mok Oh<br>Tae-Bum Kim<br>Hyouk-Soo Kwon<br>Woo-Jung Song<br>Ji-Hyang Lee |
|                                    | Chung-Ang University Hospital              | Jae-Woo Jung                                                                                  |
|                                    | Ewha Womans University Mokdong Hospital    | Young-Joo Cho                                                                                 |
|                                    | Ewha Womans University Seoul Hospital      | Min-Hye Kim<br>Ji-Su Shim                                                                     |
|                                    | Eulji General Hospital                     | Sang-Hoon Kim<br>So Young Park                                                                |
|                                    | Hanyang University Hospital                | Ho Joo Yoon<br>Sang-Heon Kim<br>Hyun Lee                                                      |
|                                    | Kangdong Sacred Heart Hospital             | Ga-Young Ban<br>Yong Suk Jo                                                                   |
|                                    | Konkuk University Medical Center           | Kwang-Ha Yoo<br>So-Young Park                                                                 |
|                                    | Korea University Anam Hospital             | Byung-Keun Kim                                                                                |
|                                    | Kyung Hee Medical Center                   | Kyoung-Hee Sohn                                                                               |
|                                    | Samsung Medical Center                     | Byung-Jae Lee                                                                                 |
|                                    | Seoul National University Hospital         | Sang-Heon Cho<br>Heung-Woo Park<br>Hye-Ryun Kang<br>Suh-Young Lee                             |
|                                    | Seoul St. Mary's Hospital                  | Chin Kook Lee<br>Hwa Young Lee                                                                |
|                                    | Severance Hospital                         | Jae-Hyun Lee                                                                                  |
| Incheon (1)                        | Gachon University Gil Medical Center       | Sung-Yoon Kang                                                                                |
| Guri (1)                           | Hanyang University Guri Hospital           | Ji-Yong Moon                                                                                  |
| Anyang (1)                         | Hallym University Sacred Heart Hospital    | Joo-Hee Kim                                                                                   |
| Seongnam (2)                       | CHA Bundang Medical Center                 | Mi-Ae Kim                                                                                     |
|                                    | Seoul National University Bundang Hospital | Yoon-Seok Chang                                                                               |
| Suwon (1)                          | Ajou University Hospital                   | Hae-Sim Park<br>Youngsoo Lee                                                                  |
| Bucheon (1)                        | Soonchunhyang University Bucheon Hospital  | Choon-Sik Park<br>An-Soo Jang<br>Jong Sook Park                                               |
| Chuncheon (1)                      | Kangwon National University Hospital       | Jae-Woo Kwon                                                                                  |
| Jeonju (1)                         | Chonbuk National University Hospital       | Yong Chul Lee                                                                                 |
|                                    |                                            | So Ri Kim                                                                                     |
|                                    |                                            | Seoung Ju Park                                                                                |
| Gwangju (1)                        | Chonnam National University Hospital       | Young-Il Koh<br>Da Woon Sim<br>Ji Eun Yu                                                      |

**Supplementary Table 1. Continued**

| Locations<br>(no. of institutions) | Institutions                           | Investigators                 |
|------------------------------------|----------------------------------------|-------------------------------|
| Daegu (2)                          | Kyungpook National University Hospital | Su-Jeong Kim                  |
|                                    | Yeungnam University Hospital           | Hyun Jung Jin                 |
| Busan (4)                          | Dong-A University Hospital             | Young-Hee Nam                 |
|                                    | Inje University Haeundae Hospital      | Chan Sun Park<br>Hyo-Jung Kim |
|                                    | Kosin University Gospel Hospital       | Gil-Soon Choi                 |
|                                    | Pusan National University Hospital     | Hye-Kyung Park                |
| Ulsan (1)                          | Ulsan University Hospital              | Taehoon Lee                   |
